# Supplementary material
Source: publisher figshare collection journal article supplement (https://gsajournals.figshare.com/ndownloader/files/30694499)
Supplement: Supplementary file 1 [file 30694499]

## Sheet: complete data set
population	line	replicate	group	set	dead female	alive female	dead male	alive male			Population = A1
A1	6	3	1	A	48	40	47	27			Line = the spefici RIL name within the A1 population
A1	13	3	1	A	39	37	65	32			Replicate = treatment replicate, each RIL was tested up to 3 times
A1	21	3	1	A	15	38	12	53			Group = groups of RILs were reared together
A1	29	3	1	A	20	53	29	52			Set = sets of RILs, nested within group, were sprayed together
A1	72	3	1	A	75	0	77	3			dead female = number of female flies that died within 10 days of infection
A1	88	3	1	A	27	57	33	65			alive female = number of female flies that were still alive 10 days after infection
A1	116	3	1	A	45	51	13	55			dead male = number of male flies that died within 10 days of infection
A1	124	3	1	A	12	53	15	52			alive male = number of male flies that were still alive 10 days after infection
A1	136	3	1	A	25	34	31	63
A1	178	3	1	A	45	15	44	8
A1	205	3	1	A	56	8	52	6
A1	216	3	1	A	15	35	27	68
A1	243	3	1	A	69	3	49	8
A1	249	3	1	A	28	49	27	45
A1	282	3	1	A	66	17	49	14
A1	299	3	1	A	44	35	32	39
A1	309	3	1	A	42	28	47	48
A1	402	3	1	A	22	70	23	69
A1	404	3	1	A	11	73	8	43
A1	405	3	1	A	26	28	44	35
A1	430	3	1	A	30	45	15	76
A1	458	3	1	A	26	29	22	66
A1	473	3	1	A	36	16	45	32
A1	484	3	1	A	7	64	10	44
A1	488	3	1	A	39	60	32	54
A1	19	3	1	B	44	52	28	32
A1	34	3	1	B	20	58	14	69
A1	45	3	1	B	20	59	46	50
A1	57	3	1	B	16	51	17	49
A1	60	3	1	B	31	25	61	29
A1	78	3	1	B	42	38	24	63
A1	100	3	1	B	90	5	51	22
A1	106	3	1	B	31	66	10	52
A1	107	3	1	B	52	15	45	8
A1	157	3	1	B	26	64	19	66
A1	166	3	1	B	64	34	26	24
A1	189	3	1	B	34	22	43	27
A1	202	3	1	B	69	18	67	19
A1	230	3	1	B	13	60	8	43
A1	235	3	1	B	74	20	52	13
A1	265	3	1	B	47	34	31	64
A1	277	3	1	B	44	24	25	32
A1	294	3	1	B	61	32	25	54
A1	298	3	1	B	22	41	14	70
A1	327	3	1	B	62	16	57	24
A1	362	3	1	B	39	30	25	62
A1	363	3	1	B	42	40	27	41
A1	439	3	1	B	22	64	31	20
A1	451	3	1	B	72	23	75	21
A1	465	3	1	B	40	60	18	75
A1	28	1	2	A	58	32	44	15
A1	28	2	2	A	49	48	82	24
A1	28	3	2	A	55	48	84	38
A1	41	1	2	A	47	40	51	66
A1	41	2	2	A	48	50	22	57
A1	41	3	2	A	37	36	26	86
A1	49	1	2	A	32	61	45	62
A1	49	2	2	A	33	74	20	92
A1	61	1	2	A	27	55	18	50
A1	61	2	2	A	34	49	31	72
A1	61	3	2	A	17	38	11	71
A1	75	1	2	A	29	93	38	88
A1	75	2	2	A	41	71	17	79
A1	75	3	2	A	34	94	20	53
A1	87	1	2	A	39	94	17	64
A1	87	2	2	A	14	92	13	96
A1	112	1	2	A	93	41	57	8
A1	112	2	2	A	72	33	72	15
A1	112	3	2	A	70	42	106	20
A1	115	1	2	A	49	104	16	83
A1	115	2	2	A	38	62	55	53
A1	115	3	2	A	50	50	21	101
A1	117	1	2	A	10	69	6	87
A1	117	2	2	A	16	55	6	55
A1	117	3	2	A	23	83	7	104
A1	120	1	2	A	46	40	45	55
A1	120	2	2	A	32	76	26	57
A1	150	1	2	A	50	60	35	86
A1	175	1	2	A	40	80	46	46
A1	175	2	2	A	31	70	25	67
A1	175	3	2	A	39	85	29	69
A1	190	1	2	A	32	43	37	66
A1	190	2	2	A	14	39	19	79
A1	229	1	2	A	26	82	70	59
A1	229	2	2	A	54	49	33	43
A1	229	3	2	A	51	51	43	71
A1	232	1	2	A	38	67	28	48
A1	232	2	2	A	30	49	34	57
A1	234	1	2	A	23	93	21	86
A1	234	2	2	A	28	72	8	84
A1	234	3	2	A	26	64	26	74
A1	254	1	2	A	33	68	14	75
A1	254	2	2	A	67	45	26	65
A1	254	3	2	A	26	63	22	75
A1	267	1	2	A	20	70	34	76
A1	267	2	2	A	23	44	43	84
A1	267	3	2	A	25	68	33	54
A1	268	1	2	A	34	52	51	64
A1	268	2	2	A	48	46	49	43
A1	268	3	2	A	75	57	45	51
A1	272	1	2	A	24	60	11	66
A1	272	2	2	A	26	72	18	87
A1	272	3	2	A	27	72	25	79
A1	274	1	2	A	27	96	12	77
A1	274	2	2	A	39	58	12	80
A1	274	3	2	A	44	64	14	88
A1	291	1	2	A	32	34	66	73
A1	291	2	2	A	15	48	26	78
A1	291	3	2	A	26	40	28	67
A1	359	1	2	A	50	50	13	74
A1	359	2	2	A	57	28	10	59
A1	359	3	2	A	75	41	16	92
A1	361	1	2	A	55	46	53	24
A1	361	2	2	A	62	41	49	54
A1	361	3	2	A	56	43	60	35
A1	445	1	2	A	28	74	24	56
A1	445	2	2	A	22	80	12	80
A1	449	1	2	A	22	84	30	65
A1	449	2	2	A	48	59	26	81
A1	449	3	2	A	42	78	29	75
A1	453	1	2	A	36	55	23	71
A1	453	2	2	A	29	64	21	70
A1	453	3	2	A	42	48	30	92
A1	455	1	2	A	20	92	19	111
A1	455	2	2	A	27	74	10	90
A1	478	1	2	A	34	68	50	60
A1	478	2	2	A	54	40	57	57
A1	478	3	2	A	54	53	46	70
A1	483	1	2	A	42	72	34	61
A1	483	2	2	A	37	69	25	58
A1	483	3	2	A	40	36	29	50
A1	213	1	3	A	54	33	68	38
A1	216	1	3	A	51	58	39	55
A1	250	1	3	A	46	62	29	45
A1	277	1	3	A	23	11	42	46
A1	343	1	3	A	69	45	36	85
A1	349	1	3	A	69	26	83	1
A1	352	1	3	A	47	26	29	26
A1	356	1	3	A	48	46	29	78
A1	360	1	3	A	38	71	26	58
A1	363	1	3	A	59	50	31	60
A1	365	1	3	A	79	35	63	37
A1	371	1	3	A	72	47	32	47
A1	378	1	3	A	50	56	42	43
A1	381	1	3	A	37	62	30	83
A1	389	1	3	A	26	101	28	71
A1	391	1	3	A	65	41	53	43
A1	398	1	3	A	71	25	16	97
A1	422	1	3	A	48	46	21	57
A1	428	1	3	A	58	68	34	62
A1	431	1	3	A	74	47	31	49
A1	437	1	3	A	60	3	44	3
A1	452	1	3	A	52	63	38	86
A1	459	1	3	A	85	20	59	27
A1	460	1	3	A	56	55	48	66
A1	467	1	3	A	90	33	48	49
A1	472	1	3	A	55	45	53	32
A1	481	1	3	A	23	56	16	44
A1	486	1	3	A	51	76	33	65
A1	490	1	3	A	61	67	22	62
A1	9	1	3	B	40	64	28	52
A1	18	1	3	B	17	60	37	50
A1	24	1	3	B	57	40	36	68
A1	34	1	3	B	36	68	17	75
A1	36	1	3	B	49	26	30	62
A1	38	1	3	B	41	43	54	53
A1	39	1	3	B	116	1	104	0
A1	40	1	3	B	32	60	11	89
A1	47	1	3	B	52	39	60	41
A1	55	1	3	B	47	54	23	48
A1	57	1	3	B	29	67	19	67
A1	59	1	3	B	27	41	10	51
A1	63	1	3	B	49	30	26	40
A1	73	1	3	B	30	24	17	47
A1	85	1	3	B	37	34	44	65
A1	86	1	3	B	33	56	22	50
A1	88	1	3	B	41	31	56	48
A1	105	1	3	B	43	50	30	78
A1	196	1	3	B	71	20	41	52
A1	211	1	3	B	14	72	10	76
A1	214	1	3	B	51	50	12	79
A1	224	1	3	B	45	40	46	83
A1	233	1	3	B	74	38	68	44
A1	257	1	3	B	34	24	8	83
A1	259	1	3	B	31	60	15	53
A1	30	1	4	A	53	79	31	61
A1	67	1	4	A	98	1	75	0
A1	78	1	4	A	68	37	19	66
A1	97	1	4	A	35	59	12	77
A1	121	1	4	A	76	27	44	14
A1	135	1	4	A	111	4	83	1
A1	174	1	4	A	9	40	7	39
A1	194	1	4	A	47	76	40	63
A1	205	1	4	A	82	7	64	4
A1	212	1	4	A	96	21	55	27
A1	217	1	4	A	12	98	15	94
A1	226	1	4	A	40	75	24	68
A1	236	1	4	A	93	22	19	68
A1	237	1	4	A	74	43	44	50
A1	241	1	4	A	57	49	47	42
A1	242	1	4	A	56	29	27	88
A1	265	1	4	A	56	67	24	72
A1	280	1	4	A	30	65	14	83
A1	281	1	4	A	59	27	48	41
A1	282	1	4	A	59	12	60	35
A1	290	1	4	A	49	61	36	50
A1	318	1	4	A	57	64	26	47
A1	338	1	4	A	20	70	8	82
A1	344	1	4	A	59	43	31	80
A1	370	1	4	A	33	60	11	81
A1	374	1	4	A	47	55	24	79
A1	394	1	4	A	32	73	22	78
A1	402	1	4	A	44	69	19	73
A1	403	1	4	A	24	122	24	97
A1	405	1	4	A	57	58	52	35
A1	406	1	4	A	29	80	8	80
A1	420	1	4	A	37	61	32	50
A1	430	1	4	A	70	50	19	59
A1	433	1	4	A	64	65	55	60
A1	438	1	4	A	64	41	38	63
A1	458	1	4	A	54	50	15	68
A1	466	1	4	A	40	39	14	67
A1	472	2	4	A	58	70	24	54
A1	473	1	4	A	74	36	38	65
A1	479	1	4	A	83	22	30	38
A1	487	1	4	A	29	83	9	96
A1	488	1	4	A	45	66	33	61
A1	4	3	5	A	67	23	47	15
A1	11	3	5	A	23	69	19	46
A1	19	2	5	A	48	51	38	38
A1	31	2	5	A	61	36	25	34
A1	36	2	5	A	65	33	21	50
A1	43	2	5	A	49	38	56	34
A1	55	3	5	A	35	41	20	42
A1	59	3	5	A	14	40	14	69
A1	72	2	5	A	59	2	65	2
A1	77	3	5	A	43	42	22	78
A1	100	2	5	A	85	2	63	21
A1	102	2	5	A	56	32	30	33
A1	103	2	5	A	14	82	12	63
A1	116	2	5	A	38	53	11	80
A1	127	2	5	A	31	58	27	28
A1	132	2	5	A	4	72	20	69
A1	138	2	5	A	37	20	39	38
A1	150	2	5	A	22	31	29	29
A1	169	2	5	A	43	8	70	2
A1	223	3	5	A	43	18	41	15
A1	233	2	5	A	40	25	64	35
A1	242	3	5	A	16	35	27	71
A1	294	2	5	A	39	18	22	39
A1	335	2	5	A	20	75	13	56
A1	420	2	5	A	25	39	24	50
A1	9	2	5	B	22	43	21	32
A1	21	2	5	B	15	48	16	54
A1	24	2	5	B	42	32	23	41
A1	39	2	5	B	25	75	79	3
A1	62	3	5	B	62	31	45	21
A1	74	2	5	B	11	42	23	65
A1	80	3	5	B	54	29	49	31
A1	90	2	5	B	30	36	13	39
A1	104	2	5	B	82	12	33	27
A1	123	2	5	B	44	28	19	31
A1	128	2	5	B	17	65	22	72
A1	140	2	5	B	23	55	32	41
A1	143	2	5	B	13	47	7	42
A1	166	2	5	B	38	28	33	45
A1	173	2	5	B	42	32	48	49
A1	249	2	5	B	44	44	23	64
A1	270	2	5	B	12	43	8	34
A1	310	2	5	B	26	28	32	34
A1	311	2	5	B	57	33	40	14
A1	334	2	5	B	52	9	78	8
A1	345	2	5	B	30	59	20	70
A1	363	2	5	B	42	37	18	39
A1	373	2	5	B	24	44	47	38
A1	383	2	5	B	31	25	44	33
A1	394	2	5	B	27	72	22	68
A1	9	3	6	A	28	49	25	58
A1	22	3	6	A	25	35	9	70
A1	34	2	6	A	30	50	21	76
A1	37	2	6	A	27	59	13	52
A1	43	3	6	A	35	23	41	32
A1	74	3	6	A	11	61	16	39
A1	79	3	6	A	80	19	67	31
A1	87	3	6	A	9	43	23	73
A1	105	3	6	A	25	55	13	46
A1	118	3	6	A	35	49	45	48
A1	138	3	6	A	26	27	22	40
A1	169	3	6	A	89	3	54	2
A1	186	3	6	A	32	53	13	38
A1	210	3	6	A	63	20	39	14
A1	218	2	6	A	9	54	11	67
A1	219	3	6	A	10	49	16	64
A1	236	3	6	A	39	38	33	41
A1	264	3	6	A	65	8	60	16
A1	281	3	6	A	38	37	29	32
A1	305	3	6	A	74	20	39	11
A1	317	3	6	A	14	53	9	54
A1	343	2	6	A	49	38	19	48
A1	349	2	6	A	57	12	64	8
A1	357	3	6	A	53	9	67	14
A1	365		6	A	47	24	64	30
A1	371	2	6	A	51	30	32	50
A1	375	2	6	A	45	25	49	18
A1	377	2	6	A	30	46	23	41
A1	378	2	6	A	47	50	46	49
A1	389	2	6	A	20	66	14	44
A1	412	2	6	A	71	20	25	45
A1	422	2	6	A	43	50	29	68
A1	429	3	6	A	14	38	24	72
A1	436	2	6	A	86	10	64	2
A1	452	3	6	A	35	65	21	51
A1	454	2	6	A	27	31	16	35
A1	465	2	6	A	30	50	11	69
A1	481	3	6	A	15	35	17	39
A1	486	3	6	A	33	65	21	60
A1	487	3	6	A	17	66	9	70
A1	2	3	7	A	26	53	10	75
A1	3	2	7	A	32	26	35	60
A1	6	2	7	A	55	39	41	32
A1	13	2	7	A	34	30	48	27
A1	15	2	7	A	27	34	27	23
A1	23	2	7	A	21	60	9	61
A1	30	2	7	A	39	43	33	54
A1	32	2	7	A	22	47	11	52
A1	35	2	7	A	30	53	5	77
A1	38	3	7	A	28	26	24	28
A1	44	3	7	A	14	45	19	59
A1	46	3	7	A	43	7	50	40
A1	49	3	7	A	24	50	29	50
A1	55	2	7	A	44	56	23	34
A1	58	2	7	A	63	8	54	10
A1	62	2	7	A	45	20	40	19
A1	63	3	7	A	34	21	41	51
A1	70	2	7	A	44	24	18	81
A1	73	3	7	A	57	41	47	46
A1	80	2	7	A	57	21	51	40
A1	84	2	7	A	36	37	18	42
A1	89	2	7	A	47	44	48	41
A1	94	2	7	A	30	32	31	38
A1	97	2	7	A	26	51	13	70
A1	101	3	7	A	46	51	27	34
A1	113	2	7	A	74	19	45	53
A1	118	2	7	A	38	40	25	29
A1	413	2	7	A	29	35	25	30
A1	433	2	7	A	33	46	26	25
A1	439	2	7	A	24	68	65	30
A1	451	2	7	A	78	20	58	18
A1	455	3	7	A	18	62	14	74
A1	460	3	7	A	37	39	39	46
A1	463	2	7	A	53	35	34	52
A1	466	2	7	A	39	46	14	60
A1	477	2	7	A	30	22	60	30
A1	479	3	7	A	53	28	50	28
A1	484	2	7	A	8	82	8	49
A1	488	2	7	A	31	51	35	60
A1	490	3	7	A	29	44	14	39
A1	3	3	8	A	31	24	29	32
A1	11	2	8	A	16	40	22	70
A1	20	2	8	A	37	30	45	51
A1	23	3	8	A	17	45	4	60
A1	119	3	8	A	14	72	10	55
A1	122	2	8	A	41	43	14	62
A1	124	2	8	A	19	78	13	38
A1	144	2	8	A	30	24	50	29
A1	151	2	8	A	36	19	36	26
A1	172	2	8	A	67	2	77	3
A1	185	3	8	A	34	22	24	43
A1	196	2	8	A	40	13	46	48
A1	200	3	8	A	21	37	34	34
A1	223	2	8	A	56	16	66	17
A1	235	2	8	A	38	14	52	21
A1	241	3	8	A	19	32	39	61
A1	264	2	8	A	55	12	81	18
A1	301	2	8	A	36	63	25	41
A1	321	3	8	A	29	21	29	48
A1	356	2	8	A	41	50	21	65
A1	362	2	8	A	39	32	24	65
A1	404	2	8	A	19	70	8	55
A1	472	3	8	A	47	50	39	46
A1	481	2	8	A	14	37	16	40
A1	482	3	8	A	10	45	14	44
A1	4	2	8	B	59	12	58	12
A1	15	3	8	B	41	48	48	45
A1	29	2	8	B	19	47	19	41
A1	35	3	8	B	19	32	4	50
A1	120	3	8	B	33	36	23	32
A1	126	3	8	B	17	39	20	62
A1	137	2	8	B	23	30	26	43
A1	139	2	8	B	19	39	19	40
A1	159	3	8	B	32	40	48	49
A1	163	3	8	B	13	38	13	74
A1	170	2	8	B	30	37	23	27
A1	181	2	8	B	39	60	35	46
A1	187	2	8	B	42	8	64	11
A1	194	3	8	B	30	61	22	49
A1	206	2	8	B	22	49	13	39
A1	210	2	8	B	68	19	66	25
A1	214	2	8	B	42	47	19	62
A1	230	2	8	B	16	80	13	63
A1	248	3	8	B	45	15	43	22
A1	258	3	8	B	40	35	55	27
A1	279	2	8	B	38	27	32	22
A1	289	2	8	B	14	45	12	56
A1	340	2	8	B	57	11	54	7
A1	433	3	8	B	33	37	27	36
A1	18	3	9	A	21	49	26	63
A1	40	3	9	A	19	49	13	81
A1	121	3	9	A	61	40	45	32
A1	158	3	9	A	33	44	25	32
A1	165	3	9	A	30	32	22	36
A1	204	3	9	A	28	38	27	29
A1	220	3	9	A	26	69	22	71
A1	225	3	9	A	72	22	35	20
A1	232	3	9	A	24	50	32	58
A1	247	3	9	A	58	3	77	14
A1	251	3	9	A	32	31	34	41
A1	257	3	9	A	14	38	13	37
A1	307	3	9	A	22	33	26	43
A1	308	3	9	A	88	3	96	2
A1	326	3	9	A	37	17	27	18
A1	332	3	9	A	26	61	20	52
A1	360	3	9	A	26	62	15	38
A1	370	3	9	A	23	46	8	56
A1	376	3	9	A	37	28	39	41
A1	398	3	9	A	31	45	17	49
A1	403	3	9	A	13	70	19	76
A1	428	3	9	A	27	26	33	40
A1	431	3	9	A	34	30	33	45
A1	445	3	9	A	21	65	19	64
A1	477	3	9	A	50	35	60	24
A1	67	3	9	B	83	3	78	1
A1	135	3	9	B	49	7	59	3
A1	143	3	9	B	15	65	9	65
A1	171	3	9	B	34	28	22	37
A1	181	3	9	B	41	53	26	49
A1	195	3	9	B	46	17	38	14
A1	214	3	9	B	33	35	19	80
A1	217	3	9	B	26	73	18	52
A1	231	3	9	B	23	67	24	64
A1	233	3	9	B	36	22	38	20
A1	246	3	9	B	18	49	11	40
A1	259	3	9	B	31	47	23	51
A1	270	3	9	B	21	58	20	47
A1	288	3	9	B	19	53	40	63
A1	290	3	9	B	36	57	33	36
A1	292	3	9	B	44	38	45	41
A1	297	3	9	B	32	45	12	40
A1	311	3	9	B	45	25	77	20
A1	340	3	9	B	83	12	79	10
A1	344	3	9	B	34	58	26	47
A1	372	3	9	B	48	50	37	45
A1	392	3	9	B	29	28	37	34
A1	406	3	9	B	25	56	12	45
A1	412	3	9	B	48	18	29	39
A1	438	3	9	B	37	34	42	38
A1	2	1	10	A	21	56	8	60
A1	4	1	10	A	30	9	58	8
A1	6	1	10	A	27	21	68	31
A1	10	1	10	A	31	21	31	37
A1	15	1	10	A	17	23	30	24
A1	22	1	10	A	31	35	15	61
A1	29	1	10	A	20	61	29	51
A1	43	1	10	A	49	32	56	42
A1	45	1	10	A	22	61	40	37
A1	48	1	10	A	20	52	13	67
A1	77	1	10	A	33	40	36	56
A1	85	2	10	A	48	31	75	22
A1	89	1	10	A	49	41	35	30
A1	91	1	10	A	36	27	32	32
A1	95	1	10	A	31	40	25	52
A1	101	1	10	A	26	19	22	13
A1	102	1	10	A	43	24	38	49
A1	108	1	10	A	17	49	39	59
A1	118	1	10	A	31	37	40	50
A1	119	1	10	A	6	60	10	63
A1	122	1	10	A	34	49	18	83
A1	136	1	10	A	38	35	42	46
A1	146	1	10	A	34	41	14	55
A1	159	1	10	A	34	56	30	52
A1	182	1	10	A	19	50	32	71
A1	185	1	10	A	36	26	30	58
A1	211	2	10	A	13	64	13	55
A1	220	1	10	A	32	53	28	44
A1	226	2	10	A	20	34	23	28
A1	243	1	10	A	80	9	63	2
A1	269	1	10	A	14	57	47	32
A1	285	1	10	A	41	34	40	28
A1	299	1	10	A	36	28	41	39
A1	305	1	10	A	53	17	76	20
A1	357	1	10	A	64	4	85	12
A1	381	2	10	A	7	74	15	74
A1	392	1	10	A	34	46	42	26
A1	404	1	10	A	13	52	11	55
A1	446	1	10	A	14	74	10	43
A1	482	1	10	A	8	64	20	75
A1	484	1	10	A	7	65	12	58
A1	14	1	10	B	43	11	73	4
A1	44	1	10	B	18	58	19	54
A1	46	1	10	B	74	7	50	26
A1	60	1	10	B	37	59	26	11
A1	62	1	10	B	36	17	34	9
A1	86	2	10	B	24	54	47	37
A1	90	1	10	B	30	23	25	39
A1	126	1	10	B	43	44	34	61
A1	127	1	10	B	36	46	67	45
A1	139	1	10	B	26	39	34	70
A1	144	1	10	B	46	40	62	30
A1	158	1	10	B	39	50	32	37
A1	162	1	10	B	16	50	11	51
A1	163	1	10	B	24	63	10	79
A1	165	1	10	B	32	47	33	48
A1	172	1	10	B	46	7	77	1
A1	178	1	10	B	77	20	88	15
A1	181	1	10	B	28	49	36	42
A1	189	1	10	B	56	39	48	33
A1	200	1	10	B	21	49	27	50
A1	202	1	10	B	73	10	66	18
A1	204	1	10	B	14	50	27	78
A1	206	1	10	B	17	32	8	55
A1	209	1	10	B	27	71	34	49
A1	231	1	10	B	24	55	32	62
A1	248	1	10	B	37	4	50	47
A1	264	1	10	B	51	6	65	19
A1	279	1	10	B	38	23	48	39
A1	283	1	10	B	38	39	56	11
A1	298	1	10	B	35	47	10	65
A1	300	1	10	B	30	62	11	56
A1	309	1	10	B	41	32	30	52
A1	321	1	10	B	55	26	24	59
A1	324	1	10	B	16	55	8	65
A1	372	1	10	B	35	52	36	34
A1	376	2	10	B	40	44	35	42
A1	429	1	10	B	17	48	29	50
A1	467	2	10	B	43	43	19	52
A1	474	1	10	B	40	43	24	62
A1	76	1	11	A	23	18	20	53
A1	79	1	11	A	48	4	39	28
A1	103	1	11	A	9	46	3	39
A1	106	1	11	A	25	46	12	70
A1	107	1	11	A	33	12	71	13
A1	109	1	11	A	39	16	33	22
A1	157	1	11	A	18	47	19	48
A1	168	1	11	A	17	40	21	75
A1	171	1	11	A	30	11	20	40
A1	183	1	11	A	16	37	10	45
A1	186	1	11	A	26	34	10	23
A1	187	1	11	A	31	13	34	7
A1	195	1	11	A	43	12	46	11
A1	199	1	11	A	45	10	48	29
A1	207	1	11	A	27	31	10	51
A1	213	2	11	A	22	39	40	57
A1	216	2	11	A	10	46	12	51
A1	219	1	11	A	18	52	16	58
A1	239	1	11	A	16	48	18	56
A1	246	1	11	A	22	42	18	57
A1	247	1	11	A	37	7	42	45
A1	251	1	11	A	38	27	24	43
A1	258	1	11	A	25	17	34	19
A1	280	2	11	A	9	49	8	64
A1	288	1	11	A	18	52	20	29
A1	289	1	11	A	13	37	16	66
A1	292	1	11	A	34	21	38	38
A1	297	1	11	A	23	26	17	49
A1	306	1	11	A	29	8	60	35
A1	307	1	11	A	15	50	17	60
A1	308	1	11	A	43	1	33	6
A1	317	1	11	A	14	49	9	48
A1	326	1	11	A	29	15	29	34
A1	327	1	11	A	46	7	25	20
A1	332	1	11	A	16	22	15	78
A1	2	2	11	B	17	28	9	78
A1	10	2	11	B	23	18	10	52
A1	38	2	11	B	24	17	26	46
A1	47	2	11	B	29	16	24	49
A1	86	3	11	B	25	48	19	61
A1	88	2	11	B	12	43	12	50
A1	101	2	11	B	19	38	23	48
A1	108	2	11	B	14	64	20	38
A1	109	2	11	B	55	4	45	22
A1	125	2	11	B	16	39	13	66
A1	137	1	11	B	16	23	35	51
A1	143	1	11	B	5	21	15	98
A1	157	2	11	B	14	21	32	82
A1	170	1	11	B	24	32	30	34
A1	186	2	11	B	12	48	14	49
A1	194	2	11	B	26	63	16	54
A1	213	3	11	B	15	59	14	61
A1	223	1	11	B	41	17	50	15
A1	224	2	11	B	16	62	11	79
A1	226	3	11	B	30	34	33	73
A1	241	2	11	B	5	24	5	40
A1	242	2	11	B	9	24	13	77
A1	248	2	11	B	33	15	33	49
A1	288	2	11	B	20	51	32	57
A1	298	2	11	B	18	43	9	57
A1	299	2	11	B	22	18	26	40
A1	317	2	11	B	9	52	4	74
A1	318	2	11	B	22	62	22	46
A1	334	1	11	B	36	2	54	7
A1	345	1	11	B	13	24	15	62
A1	357	2	11	B	56	7	70	25
A1	370	2	11	B	15	27	14	91
A1	374	2	11	B	28	47	29	40
A1	392	2	11	B	14	32	7	60
A1	403	2	11	B	3	52	10	86
A1	412	1	11	B	31	9	36	57
A1	430	2	11	B	10	50	3	56
A1	439	1	11	B	10	24	22	12
A1	454	1	11	B	20	21	25	44
A1	463	1	11	B	35	20	21	43
A1	467	3	11	B	16	47	28	41
A1	477	1	11	B	33	24	54	23
A1	18	2	12	A	20	29	17	50
A1	19	1	12	A	21	23	38	43
A1	40	2	12	A	15	58	11	69
A1	48	2	12	A	15	38	11	67
A1	59	2	12	A	7	29	13	96
A1	105	2	12	A	14	41	19	80
A1	106	2	12	A	19	46	16	77
A1	113	1	12	A	27	8	53	78
A1	136	2	12	A	23	23	25	62
A1	158	2	12	A	13	15	16	96
A1	165	2	12	A	7	6	24	106
A1	185	2	12	A	24	19	8	80
A1	195	2	12	A	39	23	47	25
A1	218	1	12	A	3	26	19	75
A1	225	1	12	A	48	11	54	21
A1	230	1	12	A	8	39	9	70
A1	231	2	12	A	16	27	21	89
A1	235	1	12	A	42	12	40	24
A1	250	2	12	A	20	19	20	80
A1	310	1	12	A	24	28	40	60
A1	338	2	12	A	8	44	11	58
A1	352	2	12	A	31	22	18	55
A1	362	1	12	A	20	13	24	68
A1	377	1	12	A	17	19	31	76
A1	429	2	12	A	7	26	14	76
A1	452	2	12	A	9	29	12	47
A1	459	2	12	A	31	8	46	75
A1	474	2	12	A	14	38	11	91
A1	486	2	12	A	18	45	12	49
A1	490	2	12	A	15	29	28	68
A1	14	2	13	A	67	30	64	25
A1	20	1	13	A	51	40	40	54
A1	22	2	13	A	28	45	3	67
A1	32	1	13	A	23	55	15	76
A1	35	1	13	A	22	44	10	96
A1	37	1	13	A	16	31	7	28
A1	44	2	13	A	24	60	14	60
A1	45	2	13	A	15	102	27	62
A1	46	2	13	A	59	12	63	56
A1	74	1	13	A	12	92	22	56
A1	76	2	13	A	27	68	23	52
A1	77	2	13	A	36	15	12	53
A1	79	2	13	A	78	29	61	32
A1	85	3	13	A	33	41	18	46
A1	107	2	13	A	70	13	73	9
A1	121	2	13	A	55	41	36	42
A1	124	1	13	A	16	67	19	70
A1	125	1	13	A	17	60	10	78
A1	126	2	13	A	24	74	14	71
A1	159	2	13	A	38	50	48	44
A1	162	2	13	A	13	96	17	60
A1	163	2	13	A	23	70	8	96
A1	168	2	13	A	7	81	21	74
A1	178	2	13	A	83	30	74	12
A1	182	2	13	A	25	57	35	65
A1	199	2	13	A	47	42	17	58
A1	202	2	13	A	55	47	47	6
A1	205	2	13	A	78	19	72	16
A1	209	2	13	A	14	52	9	57
A1	212	2	13	A	104	23	65	2
A1	217	2	13	A	34	67	25	54
A1	219	2	13	A	16	69	18	63
A1	220	2	13	A	12	90	25	67
A1	225	2	13	A	30	7	30	22
A1	236	2	13	A	53	59	34	42
A1	246	2	13	A	22	95	9	58
A1	257	2	13	A	34	56	30	58
A1	258	2	13	A	49	49	57	27
A1	487	2	13	A	16	77	8	62
A1	91	2	13	A	41	50	41	53
A1	94	1	13	A	38	38	42	60
A1	95	2	13	A	49	36	49	43
A1	104	1	13	A	63	8	32	24
A1	119	2	13	A	22	73	18	89
A1	132	1	13	A	7	106	18	54
A1	135	2	13	A	77	17	98	7
A1	146	2	13	A	32	7	46	95
A1	269	2	13	A	25	60	50	41
A1	282	2	13	A	78	33	72	12
A1	285	2	13	A	29	69	60	43
A1	297	2	13	A	43	47	9	32
A1	301	1	13	A	38	64	32	64
A1	306	2	13	A	39	32	69	38
A1	307	2	13	A	54	45	38	48
A1	309	2	13	A	44	21	39	27
A1	311	1	13	A	63	49	105	30
A1	321	2	13	A	51	45	38	62
A1	324	2	13	A	12	103	6	80
A1	326	2	13	A	70	19	49	20
A1	327	2	13	A	74	17	74	24
A1	332	2	13	A	23	77	31	51
A1	335	1	13	A	12	58	7	36
A1	340	1	13	A	44	4	45	7
A1	344	2	13	A	32	67	42	44
A1	360	2	13	A	20	85	22	54
A1	372	2	13	A	47	41	41	55
A1	373	1	13	A	36	53	72	43
A1	381	3	13	A	27	86	32	64
A1	383	1	13	A	34	48	76	52
A1	391	2	13	A	44	54	68	14
A1	402	2	13	A	15	71	19	47
A1	405	2	13	A	43	49	55	37
A1	406	2	13	A	30	59	31	64
A1	413	1	13	A	40	41	31	34
A1	428	2	13	A	30	68	48	29
A1	431	2	13	A	43	62	27	67
A1	437	2	13	A	67	0	99	0
A1	438	2	13	A	61	37	79	12
A1	446	2	13	A	32	67	19	77
A1	446	3	13	A	41	47	37	49
A1	458	2	13	A	31	44	28	76
A1	479	2	13	A	67	64	52	10
A1	482	2	13	A	17	71	34	76
A1	48	3	14	A	19	65	16	53
A1	57	2	14	A	18	68	12	47
A1	58	1	14	A	85	13	70	3
A1	60	2	14	A	65	28	76	21
A1	63	2	14	A	39	25	38	33
A1	67	2	14	A	90	8	80	4
A1	73	2	14	A	57	45	34	27
A1	78	2	14	A	23	23	10	33
A1	80	1	14	A	47	20	52	37
A1	166	1	14	A	52	31	34	43
A1	171	2	14	A	26	20	17	25
A1	174	2	14	A	16	52	23	52
A1	183	2	14	A	7	54	4	54
A1	189	2	14	A	48	29	61	23
A1	200	2	14	A	55	69	58	47
A1	204	2	14	A	57	39	44	42
A1	207	2	14	A	23	36	28	57
A1	210	1	14	A	80	23	52	24
A1	211	3	14	A	23	62	8	38
A1	237	2	14	A	53	17	66	26
A1	239	2	14	A	42	38	47	33
A1	243	2	14	A	72	15	96	8
A1	247	2	14	A	81	1	71	11
A1	249	1	14	A	34	46	18	53
A1	251	2	14	A	43	45	33	38
A1	259	2	14	A	35	38	34	45
A1	265	2	14	A	37	20	40	88
A1	277	2	14	A	33	30	23	44
A1	280	3	14	A	22	67	18	51
A1	281	2	14	A	9	23	22	22
A1	283	2	14	A	99	19	61	2
A1	290	2	14	A	26	55	52	37
A1	292	2	14	A	39	30	53	40
A1	300	2	14	A	41	40	24	39
A1	305	2	14	A	66	15	57	23
A1	308	2	14	A	104	2	47	0
A1	398	2	14	A	2	38	14	113
A1	460	2	14	A	26	34	29	45
A1	473	2	14	A	67	24	62	39
A1	10	3	15	A	43	32	21	51
A1	30	3	15	A	20	32	34	62
A1	32	3	15	A	21	63	14	79
A1	47	3	15	A	39	25	42	45
A1	70	3	15	A	31	20	15	49
A1	76	3	15	A	33	59	34	54
A1	108	3	15	A	13	40	20	40
A1	109	3	15	A	69	18	54	27
A1	137	3	15	A	34	42	44	56
A1	162	3	15	A	19	75	23	72
A1	168	3	15	A	19	61	17	45
A1	196	3	15	A	76	22	43	48
A1	206	3	15	A	33	52	12	51
A1	207	3	15	A	23	42	21	45
A1	212	3	15	A	77	19	71	16
A1	239	3	15	A	24	40	33	58
A1	269	3	15	A	17	52	33	33
A1	283	3	15	A	68	17	71	9
A1	285	3	15	A	46	51	52	42
A1	300	3	15	A	38	45	25	47
A1	306	3	15	A	44	22	45	23
A1	318	3	15	A	22	45	25	44
A1	352	3	15	A	33	22	43	45
A1	371	3	15	A	35	25	31	48
A1	374	3	15	A	32	57	17	33
A1	14	3	15	B	70	23	57	14
A1	20	3	15	B	29	28	33	42
A1	36	3	15	B	30	20	23	34
A1	58	3	15	B	65	4	75	8
A1	91	3	15	B	38	44	26	28
A1	95	3	15	B	30	30	36	40
A1	125	3	15	B	14	45	10	54
A1	146	3	15	B	26	24	22	60
A1	174	3	15	B	18	55	28	72
A1	182	3	15	B	24	66	24	46
A1	183	3	15	B	12	58	12	49
A1	190	3	15	B	36	55	26	69
A1	199	3	15	B	43	20	32	27
A1	209	3	15	B	27	72	15	45
A1	224	3	15	B	37	49	22	62
A1	237	3	15	B	43	19	53	36
A1	250	3	15	B	25	33	13	43
A1	324	3	15	B	9	48	9	56
A1	338	3	15	B	13	48	17	80
A1	391	3	15	B	47	25	34	17
A1	437	3	15	B	73	2	94	5
A1	459	3	15	B	70	22	30	23
A1	474	3	15	B	31	48	24	54
A1	24	3	16	A	52	39	23	35
A1	31	3	16	A	39	20	43	47
A1	37	3	16	A	26	46	15	70
A1	84	3	16	A	40	49	23	41
A1	89	3	16	A	39	31	25	24
A1	94	3	16	A	43	47	39	46
A1	97	3	16	A	24	39	10	45
A1	102	3	16	A	37	20	45	43
A1	103	3	16	A	6	75	6	68
A1	104	3	16	A	49	9	32	30
A1	113	3	16	A	37	15	31	42
A1	122	3	16	A	35	49	14	43
A1	123	3	16	A	36	20	29	59
A1	127	3	16	A	29	42	47	35
A1	132	3	16	A	7	64	13	73
A1	139	3	16	A	33	55	20	38
A1	144	3	16	A	43	25	56	37
A1	151	3	16	A	48	30	53	27
A1	170	3	16	A	39	43	47	50
A1	172	3	16	A	70	7	57	9
A1	173	3	16	A	23	28	55	40
A1	187	3	16	A	65	16	49	18
A1	218	3	16	A	20	70	13	66
A1	279	3	16	A	35	19	33	20
A1	289	3	16	A	22	52	11	52
A1	301	3	16	A	17	35	20	36
A1	310	3	16	A	40	52	25	29
A1	335	3	16	A	14	55	9	50
A1	343	3	16	A	36	25	16	45
A1	345	3	16	A	36	64	12	65
A1	356	3	16	A	28	30	18	50
A1	373	3	16	A	45	45	29	21
A1	383	3	16	A	41	50	47	51
A1	389	3	16	A	14	45	18	52
A1	394	3	16	A	19	74	26	70
A1	413	3	16	A	25	32	33	42
A1	420	3	16	A	28	50	34	55
A1	436	3	16	A	65	0	58	1
A1	454	3	16	A	24	29	33	56
A1	466	3	16	A	26	24	10	40
A1	3	1	17	A	42	27	32	51
A1	11	1	17	A	18	52	18	56
A1	13	1	17	A	33	30	50	24
A1	21	1	17	A	16	46	12	50
A1	23	1	17	A	15	47	5	77
A1	31	1	17	A	32	12	20	24
A1	70	1	17	A	26	16	13	56
A1	72	1	17	A	73	0	54	0
A1	84	1	17	A	39	37	20	41
A1	100	1	17	A	87	0	38	20
A1	116	1	17	A	26	29	9	44
A1	123	1	17	A	48	22	18	30
A1	128	1	17	A	19	68	9	71
A1	138	1	17	A	22	17	24	31
A1	140	1	17	A	26	41	19	43
A1	151	1	17	A	31	14	39	31
A1	169	1	17	A	57	13	68	2
A1	173	1	17	A	39	34	32	28
A1	270	1	17	A	18	60	17	58
A1	294	1	17	A	32	17	18	36
A1	375	1	17	A	45	18	52	11
A1	376	1	17	A	42	28	17	33
A1	436	1	17	A	35	1	57	1
A1	451	1	17	A	51	13	59	21
A1	465	1	17	A	22	32	6	57
